# Supplementary material for: Development of a flow cytometric panel to assess prognostic biomarkers in fine needle aspirates of canine cutaneous or subcutaneous mast cell tumors
Source: Front Vet Sci. 2023 Nov 21;10:1279881. doi: 10.3389/fvets.2023.1279881 (PMC10704158; doi:10.3389/fvets.2023.1279881)
Supplement: Supplementary file 3 [file Table_1.XLSX]

## Sheet: Sample Data
Patient Number	1	2	3	4	5	6	7	8	9
Age	9yr	10yr	12yr	10yr	10yr	13yr	1yr	5yr	12yr
Sex	FS	MC	FS	FS	MC	FS	MC	FS	FS
Breed	Weimaraner	Mixed	Whippet mix	Chesapeake bay	Pug	Briard	Labrador	Mixed	Border collie
MCT size (longest diameter)	1cm	2cm	1.2cm	1cm	3cm	4cm	2cm	0.5cm	5cm
MCT anatomic location	Thorax	Lateral thorax	Paw	Knee	Multifocal	Ventral neck	Muzzle	RH limb	Mammary
Cutaneous or Subcutaneous	Cutaneous	NA	NA	NA	NA	NA	Cutaneous	Cutaneous	NA
Histologic grade	II/L	NA	NA	NA	NA	NA	I/L	II/L	NA
Lymph node metastasis (y/n/NA)	NA	NA	Suspecious	NA	Yes	Suspecious	No	NA	Yes
Spleen metastasis (y/n/NA)	NA	NA	No	No	Suspecious	NA	NA	NA	No
Liver metastasis (y/n/NA)	NA	NA	No	No	No	No	NA	NA	No
MCT collected pre-op/post-op	post-op	pre-op	pre-op	pre-op	pre-op	pre-op	post-op	post-op	pre-op
Collection method (FNA or scraping)	FNA	FNA	FNA	FNA	FNA	FNA	FNA	FNA	FNA
Collection needle gage	22	22	22	22	22	22	22	22	22
# syringe collected	3	2	1	2	4	4	3	3	2
Hours until sample processed	2	2	2	2	2	2	2	0	1
Days until FC acquisition	Same day	Same day	NA	Next day	Same day	Same day	2 days	NA	7 days
Total viable cell count	200000	700000	200	190000	16000000	3000000	1600000	<80,000	800000
Mast cell proportion (% CD117 in 7AAD+ gate)	0.697	NA	NA	NA	NA	NA	0.34	NA	0.0206
Ki67 expression (% Ki67 in CD117+ gate)	0.0236	NA	NA	NA	NA	NA	0.052	NA	0.288
FS - Female spayed, MC - Male castrated, MCT - mase cell tumor, NA - Not available, FNA - Fine needle aspirate.
